# Supplementary material for: Using magnetic nanoparticles to explore symbiotic interactions
Source: Research Square preprint supplement (doi:10.21203/rs.3.rs-7368313/v1), 2025-09-17
Supplement: Supplementary file 1 [file 82a7c28ba67f00409b94c518.pdf]

## Supplementary Materials

### Using magnetic nanoparticles to explore symbiotic interactions

Dulce G. Guillen Matus<sup>1</sup>, Eric J. Koch<sup>2</sup>, Nidhi Vijayan<sup>3</sup>, Hayden J. Good<sup>4,5</sup>, Robert M. Samples<sup>6</sup>, Carlos M. Rinaldi-Ramos<sup>4,5</sup>, David P. Arnold<sup>7</sup>, Spencer V. Nyholm<sup>3\*</sup>, Marcy J. Balunas<sup>1,8\*</sup>, and Jamie S. Foster<sup>2\*</sup>

<sup>1</sup>Department of Microbiology and Immunology, University of Michigan, Ann Arbor, MI 48109, USA

<sup>2</sup>Department of Microbiology and Cell Science, Space Life Science Lab, University of Florida, Merritt Island, FL 32953, USA

<sup>3</sup>Department of Molecular and Cell Biology, University of Connecticut, Storrs, CT 06269

<sup>4</sup>Department of Chemical Engineering, University of Florida, Gainesville, FL, USA

<sup>5</sup>J. Crayton Pruitt Family Department of Biomedical Engineering, University of Florida, Gainesville, FL, USA

<sup>6</sup>Department of Pharmaceutical Sciences, University of Connecticut, Storrs, CT 06269

<sup>7</sup>Department of Electrical and Computer Engineering, University of Florida, Gainesville, FL, USA

<sup>8</sup>Department of Medicinal Chemistry, University of Michigan, Ann Arbor, MI 48109, USA

\*Corresponding authors: [jfoster@ufl.edu](mailto:jfoster@ufl.edu), [mbalunas@umich.edu](mailto:mbalunas@umich.edu), and [spencer.nyholm@uconn.edu](mailto:spencer.nyholm@uconn.edu)

Running Title: Magnetic nanoparticles as tools for symbiosis

Keywords: magnetic nanoparticles, magnetic particle imaging, *Euprymna scolopes*, *Vibrio fischeri*, symbiosis, metabolomics, proteomics

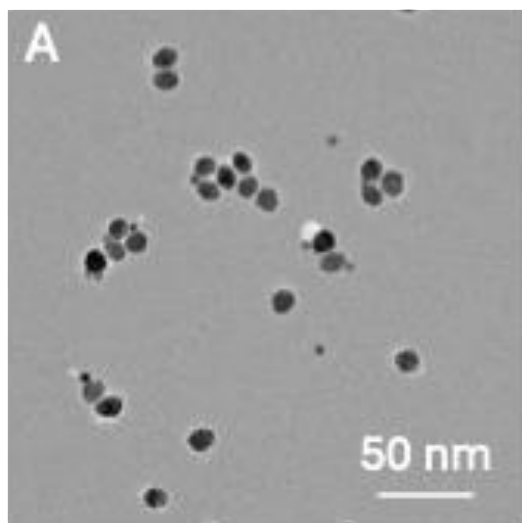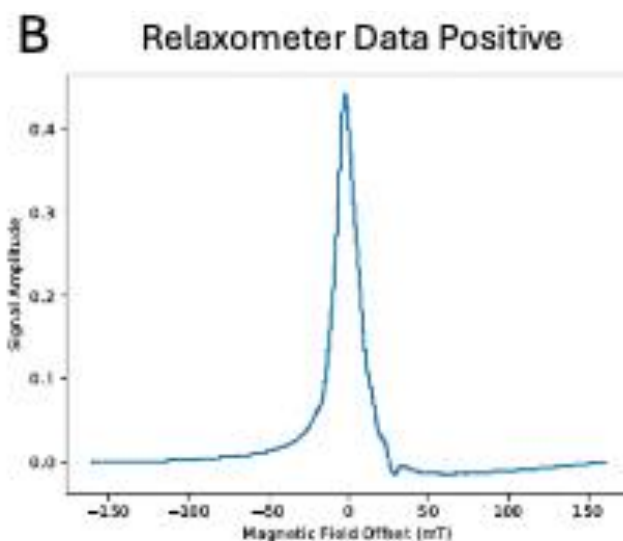

**Supplemental Figure S1.** Overview of the magnetic nanoparticles properties (MNPs) used in this study. **(A)** Transmission electron micrograph of the MNPs depicting uniform shape and monodispersal. **(B)** Relaxometer measurement of the dynamic relaxation of MNPs in the positive mode revealing signal amplitude of 28.1 AU per mg of Fe under magnetic particle imaging with a full width at half maximum measurement at 16.2 mT.

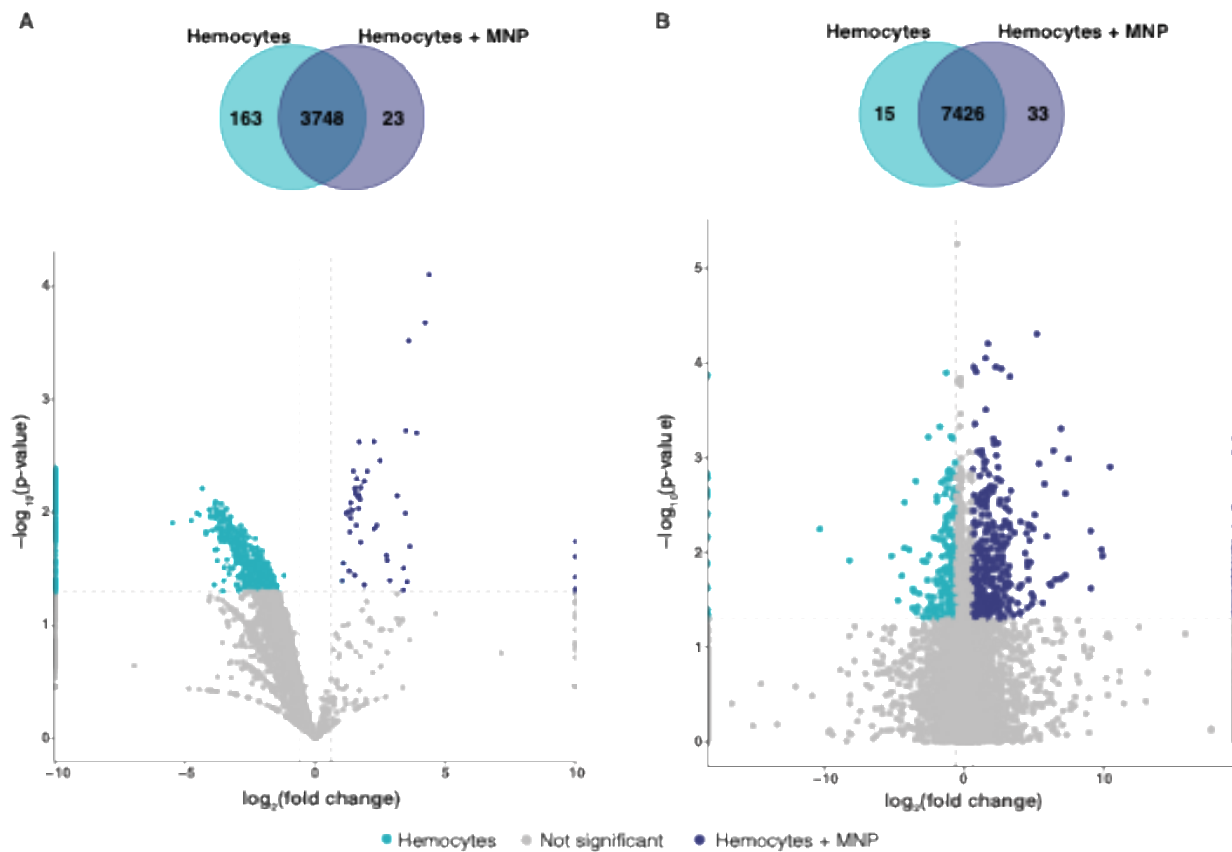

**Supplemental Figure S2.** Effect of magnetic nanoparticles uptake on the proteomes or metabolomes of *E. scolopes* hemocytes. **(A)** Uncorrected volcano plot and Venn diagram of shared proteins between hemocytes with and without magnetic nanoparticles (MNPs). **(B)** Uncorrected volcano and Venn diagram of shared metabolites between hemocytes with and without MNPs.
